RESEARCH ARTICLE

# First longitudinal study of seal-feeding killer whales (*Orcinus orca*) in Norwegian coastal waters

Eve Jourdain<sup>1</sup>\*, Dag Vongraven<sup>2</sup>\*, Anna Bisther<sup>3</sup>‡, Richard Karoliussen<sup>1</sup>‡

**1** Norwegian Orca Survey, Andenes, Norway, **2** Norwegian Polar Institute, Tromsø, Norway, **3** Reportagebörsen, Gothenburg, Sweden

\* These authors contributed equally to this work.

‡ These authors also contributed equally to this work.

\* [eve@norwegianorcasurvey.no](mailto:eve@norwegianorcasurvey.no)

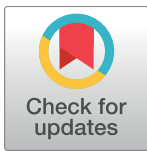

**OPEN ACCESS**

**Citation:** Jourdain E, Vongraven D, Bisther A, Karoliussen R (2017) First longitudinal study of seal-feeding killer whales (*Orcinus orca*) in Norwegian coastal waters. PLoS ONE 12(6): e0180099. <https://doi.org/10.1371/journal.pone.0180099>

**Editor:** Yan Ropert-Coudert, Centre National de la Recherche Scientifique, FRANCE

**Received:** April 10, 2017

**Accepted:** June 9, 2017

**Published:** June 30, 2017

**Copyright:** © 2017 Jourdain et al. This is an open access article distributed under the terms of the [Creative Commons Attribution License](https://creativecommons.org/licenses/by/4.0/), which permits unrestricted use, distribution, and reproduction in any medium, provided the original author and source are credited.

**Data Availability Statement:** Data from Figshare are now publicly available at [https://figshare.com/articles/Data\\_from\\_First\\_longitudinal\\_study\\_of\\_seal-feeding\\_killer\\_whales\\_Orcinus\\_orca\\_in\\_Norwegian\\_coastal\\_waters/5039280](https://figshare.com/articles/Data_from_First_longitudinal_study_of_seal-feeding_killer_whales_Orcinus_orca_in_Norwegian_coastal_waters/5039280) (DOI: 10.6084/m9.figshare.5039280).

**Funding:** Fieldwork conducted from 1988 through 1993 was partly funded by the Marine Mammal Program of the National Research Council ([http://www.forskningradet.no/en/Home\\_page/1177315753906](http://www.forskningradet.no/en/Home_page/1177315753906)) to DV and AB. From 2014

## Abstract

Killer whales (*Orcinus orca*) have been documented preying on either fish or marine mammals in several regions, suggesting that this odontocete species has the ability to specialize on different types of prey. Off Norway, killer whales have been shown to rely on the Atlantic herring (*Clupea harengus*) as a main prey resource. Infrequent observations have revealed seals as an additional component of their diet, yet the extent of predation on marine mammals has remained largely unknown. Here, we present the findings of 29 years of photographic and observational data on seal-feeding killer whale groups identified in Norwegian coastal waters. Four groups have been observed preying and feeding on seals over several years, taking both harbor (*Phoca vitulina*) and grey (*Halichoerus grypus*) seals. These stable groups are shown to adopt small group sizes, were typically observed in near-shore areas and were not encountered on herring wintering grounds. Behavioral and social traits adopted by these groups are similar to those of pinniped-feeding killer whales from other regions. The potential ecological reasons and the extent of such prey specializations are discussed.

## Introduction

Killer whales (*Orcinus orca*) are cosmopolitan apex predators, preying on over 140 prey species including bony and cartilaginous fish, squids, mammals, reptiles and birds throughout their cosmopolite range [1, 2]. Despite a broad diet, some local populations feed on a narrow range of prey, adapting feeding strategies to prey type and availability [3–6].

In coastal waters of the eastern North Pacific, the most extensive studies have been focused on two sympatric ecotypes of killer whales, differing in morphology, pigmentation, acoustics, social behavior, group size, diet, movement patterns and genetics [4, 7–13]. The so-called resident type appears to be exclusively fish-feeding, preferentially preying on salmon species, whereas the transient type preys exclusively on marine-mammals [4, 10, 12, 14].

More recently, similar ecological specializations have been identified in other regions; off southeastern Alaska [5], Russian Far East [15] and in Antarctica [6, 16, 17]. Interestingly, killer

through 2016, fieldwork was financed by grants from Spare-Bank 1 Nord-Norge (<https://www.sparebank1.no/bank/privat.html>) to RK and EJ, Sea World and Busch Gardens Conservation fund (<https://swbg-conservationfund.org>) to RK and EJ, and Sea World and Parks Entertainment (<https://seaworldparks.com>) to EJ and RK. One of the authors is also employed, at the time of writing, by a commercial company being Reportagebørsen. The two commercial funding organizations only provided financial support to the study, and Reportagebørsen only provides AB with support in the form of salary. The funders had no role in study design, data collection and analysis, decision to publish, or preparation of the manuscript.

**Competing interests:** Part of the funding was from a commercial source, being Sea World and Busch Gardens Conservation fund and Sea World and Parks Entertainment. AB is also employed (at the time of writing) by commercial company Reportagebørsen. This does not alter our adherence to PLOS ONE policies on sharing data and materials.

whales thought to largely or exclusively specialize on pinniped-prey seem to adopt identical behavioral and social adaptations as described for transient killer whales [18–20]. A convergence of plastic traits has been suggested as an adaptation to the type of prey being hunted [21–23].

In the North Atlantic, similar variations in killer whale feeding behavior have been suggested but never sufficiently documented, and a possible ecotype delineation is less clear [24, 25]. Based on analyses of nitrogen stable isotopes and tooth wear in samples from museum and stranded specimen, Foote and colleagues [26] suggested the presence of a generalist Type 1 and a marine-mammal specialist Type 2, the two being partly sympatric in some overlapping regions of their respective ranges. Killer whales ranging off Norway, Iceland and in the North Sea were proposed to be the Type 1, having the Atlantic herring (*Clupea harengus*) as a main prey resource but with individual and/or group variations in the proportions of prey items consumed [26]. An ecological gradient was suggested within this Type 1, with some groups persistently feeding on higher trophic level prey.

Off Norway, research conducted over the past three decades has largely focused on areas where killer whales congregate seasonally in large numbers owing to abundance of the Norwegian Spring Spawning (NSS) stock of the Atlantic herring [27, 28]. Seasonal movement pattern, site fidelity of identified individuals as well as complex coordinated feeding behaviors highlighted killer whales as herring specialists [27–29]. Sporadic predation observations also suggested additional types of prey including seals and harbor porpoise that support individuals feeding at higher trophic levels [24, 30, 31]. However, because these opportunistic observations often lack identification of individuals, the potential ecological specializations of marine mammal eating killer whales in Norwegian waters has remained largely undocumented.

In this study, we document identified killer whales that have been persistently feeding on seals for a minimum of 30 years in Norwegian coastal waters. To determine if these whales displayed similar adaptations to pinniped-feeding killer whales in other regions, and as a first step towards assessing the scope of prey specialization, we looked into specific occurrence patterns, foraging behavior and social structure. Using photo-identification and predation data collected from 1988 through 2016, the specific aims of the study were to 1) highlight apparent prey specialization of seal-eating killer whales and 2) provide the first substantial baseline information about killer whale predation on pinnipeds in Norwegian waters, while contributing data on behavioral characteristics of seal-feeding killer whales from a newly investigated region.

## Materials and methods

### Data collection

The data set used for this study consisted of records of photo-identified individual killer whales and observations of predation events from different periods and various areas (Fig 1) as follows:

1. Long-term killer whale study initiated in 2013 in northern Norway [34]:  
Records of predation events involving identified killer whales were collected year round off Andenes, northern Norway (approximately 69° 19'N, 16° 08'E; Fig 1), as part of a study on the foraging ecology of killer whales. Field efforts began after a sighting report from a network of local people including fishermen, all-seasons whale-watching companies and local inhabitants. Data collection was also conducted seasonally further north, off Troms (69° 50'N, 18° 30'E), in October–November 2014, 2015 and 2016. On each encounter, information including date, time, location, group size estimate and group composition was

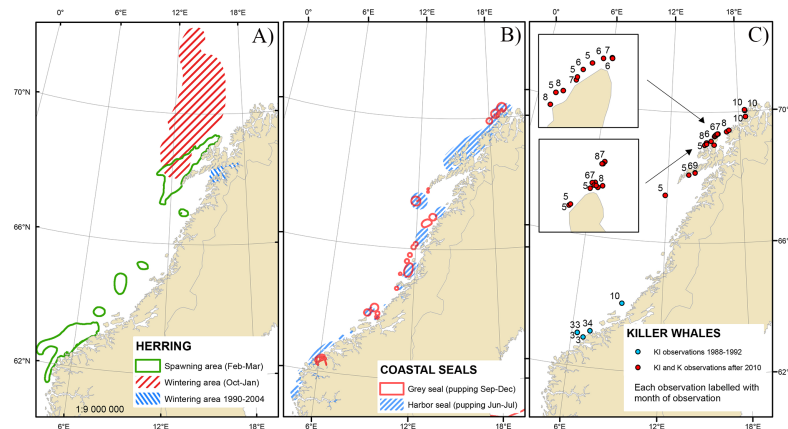

**Fig 1. Important prey areas and observations of seal-feeding killer whale groups.** The left panel (A) shows seasonal herring grounds since 1990 while the middle panel (B) shows areas of abundance of coastal seals since 1990 [32]. The right panel (C) shows locations of K and KI whales sightings since 1988. (The map was made in ESRI ArcGIS software [33] using public domain map data @ [naturalearthdata.com](http://naturalearthdata.com)).

<https://doi.org/10.1371/journal.pone.0180099.g001>

logged. Using a DSLR camera equipped with a telephoto lens, individual killer whales were systematically photographed throughout the encounters. On a few occasions, highly distinctive individuals were identified from direct observations in the field. Behavior and predation events were recorded using *Ad libitum* sampling methods [35]. Surfacing whales displaying speed bursts, sudden changes in direction and circling behaviors often indicated ongoing predation incidents that were documented with photographs and/or video recordings. Whenever possible, prey species was visually identified on the field or through photographs. When the whales had finished feeding and moved on, the feeding spot was approached and prey remains collected using a fine-mesh dip net to confirm prey consumption. Encounters ended when weather, light and/or sea conditions became too poor to continue or if visual contact with the whales was lost.

2. Photo-identification study based on central Norwegian coast 1987–1993 [24]:

A photo-identification study was initiated in 1987 in areas covering the herring spawning ground that was mainly located off the Møre coast, and approximately 100 nm of coastline north from this area (between latitudes 62°45'N–64°05'N and longitudes 6°–9°15'E, Fig 1). From 1987 through 1993, the collecting of ID photographs was opportunistic and conducted from November through March, resulting in a catalogue of 605 individuals [24]. All photographs were taken with analogue cameras, fitted with 300 mm telephoto lenses and predation events were recorded *Ad libitum* [35]. Information including date, time, location and group size estimate was noted during each encounter. Additional fieldwork was conducted around harbor and grey seal pupping colonies in June and September–October, respectively. Field studies were conducted in Møre areas in the years 1987–1993 sporadically during the months November through March. In the period 1990–1993 field studies during October through December were carried out in the Tysfjord area (68°16'N, 15°52'E) for four consecutive years.

3. Photo-identification study based in northern Norway 1986–2003 [36]:

A catalogue of 585 individual killer whales photographically identified in northern Norway, as part of a long-term killer whale study, was available for review. This catalogue consisted of photographs taken in northern Norway in the former NSS herring wintering ground in

Tysfjord-Ofofjord-Vestfjord from 1986 to 2003 (work of Similä and colleagues mentioned in [36]).

#### 4. Opportunistic imagery from other sources:

One video containing unidentifiable whales preying on seals was collected from a wildlife photographer in 1988 at Orskjera, off the Møre coast (63°7'N, 7°15'E). Substantial amounts of high resolution opportunistic photographs, taken from 2010 through 2016 and accompanied by metadata on date and location, were also provided by wildlife photographers. Photographs were taken in all seasons in coastal waters between latitudes 62° and 72° (Fig 1). Six videos showing killer whales hunting seal prey, including two accompanied by high resolution photographs, were also available for review.

## Data analysis

All accounts of killer whales preying on seals were recorded, including both successful and failed predation events. Following photo-identification protocols developed by Bigg [7], individual killer whales specifically involved in these predation events were identified using the shape, pigmentation and scarring patterns of the dorsal fin and saddle patch. Photographs of both left and right sides were used for individual identification. Best photographs for each individual in each encounter was selected and rated for quality (Q), ranging from 0 (lowest) to 2 (highest) based on sharpness, contrast and angle of the dorsal fin in relation to the camera. All further sightings of individual killer whales identified as seal-feeding were recorded, including information on date and location. Resulting sighting histories, including only identifications of quality Q1 and Q2, were further used to map temporal and spatial occurrence patterns.

A group of whales was defined as all individual killer whales visible within the range of the observer and displaying coordinated activities (as per [11, 22, 37]). To assess group size, only encounters for which all individuals were believed to be identified were used. Group sizes adopted by seal-feeding vs fish-feeding killer whales were compared using a Mann-Whitney-Wilcoxon test performed in R [38].

Association patterns between individuals and persistence of groups were analyzed utilizing SOCPROG 2.6, a software specifically designed to study social organization of animal populations [39]. Association indices were calculated for all pairs of individuals using the Simple-Ratio Index, with association defined as presence in the same group within a sampling period (i.e an encounter on a certain date) and with all group members presumed identified [40]. From opportunistic photographs, group membership could be determined by looking at individuals captured within frames, or by pooling frames within certain time intervals [21]. Unreliably marked calves were excluded from these analyses and only Q2 identifications were accounted for. In order to reduce bias associated with small sample sizes, restrictions were also set to account exclusively for individuals observed in at least four sampling periods (as per [41]). The resulting association matrix was summarized in a sociogram with nodes representing individuals and edges indicating incidence and strength of relationship between each pair of whales [42]. Permuting associations within samples enabled testing for potential preferred associations among individuals [43, 44]. If the standard deviation (SD) calculated on the pairwise associations was significantly greater for the real association indices than the random data set, the null hypothesis of individuals associating at random was rejected. To further investigate temporal patterns in detected associations, the lagged association rate was calculated [45, 46]. This analysis calculates the probability for two animals to be associated again after some time, given that they have been associated before. The null association rate, which is the expected value of the lagged association rate if individuals associate at random, was plotted for comparison.



## Results

A total of 23 predation events of killer whales on seal prey in Norwegian coastal waters was documented from 15,000 photographs taken over 300 days of research effort between March 1988 and June 1992 [24], and 158,000 photographs, six videos and field notes taken over 468 days between July 2010 and December 2016. Nineteen of these predation events resulted in kills and consumption of the prey, and four were unsuccessful chases. Positive identification of individual killer whales involved was possible for 14 of these 23 predation events, and these whales were further re-sighted on 23 encounters, with no observed predation. Both young and adult individuals of grey (*Halichoerus grypus*) and harbor seals (*Phoca vitulina*) have been observed as part of the whales' chosen pinniped prey.

### Identification of seal-eating killer whales

Five killer whales, including so-called KI-03, KI-05 and KI-06, were first identified chasing harbor seals in March 1988 off the central coast of Norway. Three more individuals were identified in this group while foraging in a grey seal pupping colony in October 1990, before being identified as part of a larger group of 11 whales in March 1991. KI-03, KI-05 and KI-06 were re-sighted on several occasions between May 2011 and August 2016, in northern Norway (Fig 2). To ensure consistence with the longitudinal study, all individual whales encountered with KI-03, KI-05 and KI-06 on at least one occasion between 2010 and 2016 were given similar alphanumeric codes and considered as members of the KI group.

KI whales were observed chasing or preying on pinnipeds on eight occasions (Fig 3). They were also observed twice feeding on herring at herring spawning grounds in 1991 off the Møre region, in association with other known herring-feeding killer whales, before travelling to a seal haul-out where they were observed for several hours unsuccessfully chasing harbor seals.

First identified in July 2010, individuals K1, K2, K3, K4 and K5, hereafter referred to as the K group, constitute the second assemblage of killer whales identified as seal-feeding.

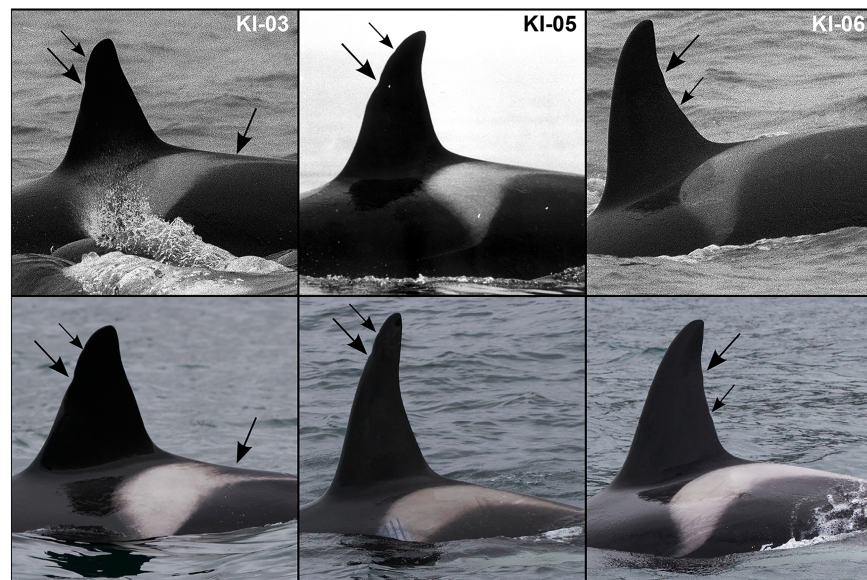

**Fig 2. Photographs of seal-feeding killer whales KI-03, KI-05 and KI-06.** Individuals in upper photographs, observed off central coast of Norway in 1988, match individuals visible on the lower row of photographs, taken off Andenes in June 2015.

<https://doi.org/10.1371/journal.pone.0180099.g002>

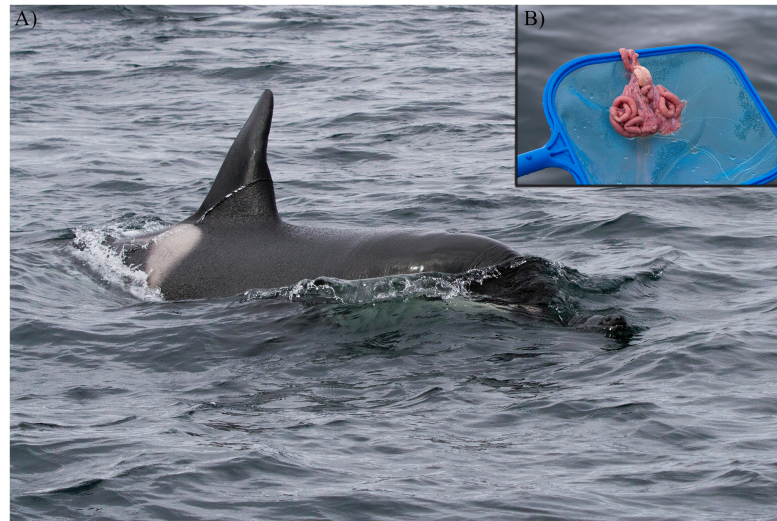

**Fig 3. Photograph of KI-03 preying upon a harbor seal pup in June 2015.** The photograph (A) illustrates the predation observation and the inset (B) confirms effective prey consumption.

<https://doi.org/10.1371/journal.pone.0180099.g003>

K whales were observed chasing or preying on seals on six occasions and were never observed feeding on fish during the course of this study.

Predation observations for KI and K whales are summarized in [Table 1](#). There was no evidence for interaction between KI and K whales in this study.

**Table 1. Summary of recorded predation events on seals where involved individual killer whales could be identified.**

| Date         | Location            | Predation type  | Minimum whales identified                                  | Seal species                                      | Evidence              |
|--------------|---------------------|-----------------|------------------------------------------------------------|---------------------------------------------------|-----------------------|
| 27 Mar 1988  | Orskjera, Møre      | Chase           | KI03, KI05, KI06                                           | Harbor seal                                       | Video                 |
| 15 Oct 1990  | Froan, Trøndelag    | Blubber feeding | KI03                                                       | Undetermined                                      | Photographs           |
| 10 Mar 1991  | Ona, Møre           | Chase           | KI03, KI05, KI06                                           | Harbor seal                                       | Photographs           |
| 27 Jun 2013  | Stø, Nordland       | Kill            | KI02, KI05, KI06, KI08, KI09, KI10                         | Undetermined                                      | Photographs           |
| 15 Jul 2013  | Andenes, Nordland   | Kill            | K1, K2, K3, K4, K5                                         | Harbor seal                                       | Photographs           |
| 27 Jul 2013  | Andenes, Nordland   | Kill            | KI01, KI03, KI07                                           | Harbour seal                                      | Photographs and video |
| 30 May 2014  | Andenes, Nordland   | Kill            | K1                                                         | Undetermined                                      | Photographs           |
| 31 May 2014  | Andenes, Nordland   | Kill            | K1, K2, K3, K4, K5                                         | Undetermined                                      | Photographs and video |
| 14 Sept 2014 | Vestfjord, Nordland | Chase           | K1, K2, K3, K4, K5                                         | Harbour seal                                      | Video                 |
| 27 Jun 2015  | Andenes, Nordland   | Kill (3)        | KI01, KI02, KI03, KI04, KI05, KI06, KI07, KI08, KI09, KI10 | Harbour seal (1), grey seal (1), undetermined (1) | Photographs           |
| 19 Aug 2016  | Senja, Troms        | Kill (2)        | K1, K2, K3, K4, K5                                         | Harbour seal (1) and undetermined (1)             | Photographs and video |

For encounters that occurred in the period 1988–1991, only identifications of whales re-sighted after 2010 are indicated.

<https://doi.org/10.1371/journal.pone.0180099.t001>

**Table 2. Sighting histories of KI and K whales.**

| Group | 1988 | 1989 | 1990 | 1991 | 1992 | 2010 | 2011 | 2012 | 2013 | 2014 | 2015 | 2016 | Total |
|-------|------|------|------|------|------|------|------|------|------|------|------|------|-------|
| KI    | 1    | 0    | 1    | 3    | 1    | 0    | 1    | 1    | 4    | 2    | 2    | 3    | 19    |
| K     | 0    | 0    | 0    | 0    | 0    | 1    | 0    | 0    | 2    | 5    | 3    | 4    | 15    |

The number of encounters with KI and K whales is given for each year during the periods 1988–1992 and 2010–2016.

<https://doi.org/10.1371/journal.pone.0180099.t002>

### Occurrence pattern

From 1988 through 1992 off the central coast of Norway, KI whales were encountered on six observation days during the months of March (5) and October (1). Between 2010 and 2016 off northern Norway, these whales were observed on 13 days from May through August (Table 2 and Fig 4). K whales were also encountered on 15 occasions between 2010 and 2016, with sightings from May through October (Table 2 and Fig 4). Observations covered a maximum range of 800 km between re-sightings of KI whales and 350 km for K whales.

KI and K whales were not identified on the former herring wintering grounds in Tysfjord, where 584 individual killer whales were identified from 1986 through 2003 (work of Similä and colleagues, mentioned in [36]). They were also not encountered on the recently established herring wintering ground off Troms and Andfjord regions where 656 individuals were identified during November-February and, despite substantial effort, between 2010 and 2016 (Fig 4; [34]).

All encounters with KI and K groups documented in this study occurred within 300 meters from the shoreline or around reefs and seal haul-outs.

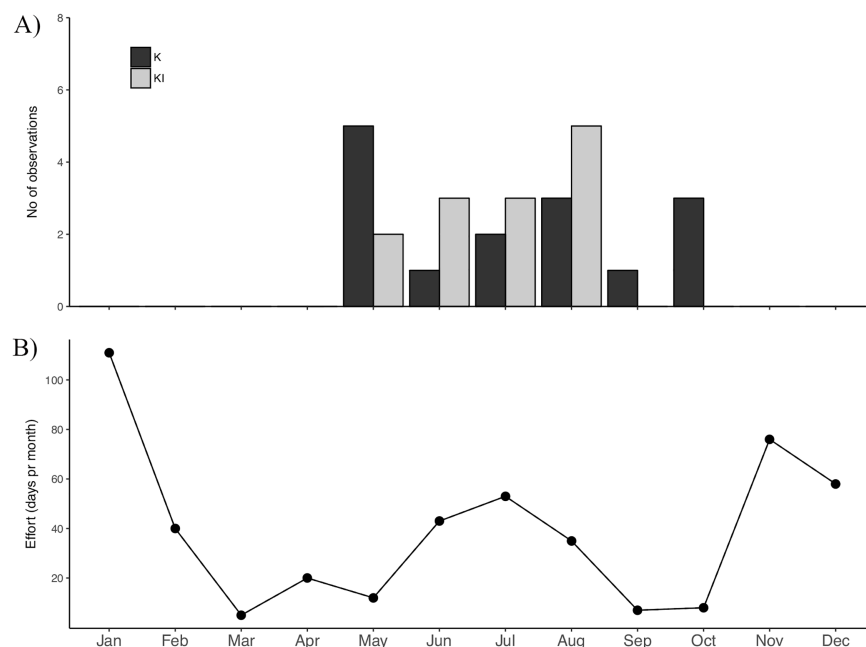

**Fig 4. Observations of seal-feeding killer whales in relation to effort from 2010 through 2016.** The plot (A) shows the cumulative sighting distribution of KI (dark bars) and K (light bars) whales while the plot (B) reports on the cumulative number of effort days spent in the field for each month, from 2010 through 2016 in northern Norway.

<https://doi.org/10.1371/journal.pone.0180099.g004>

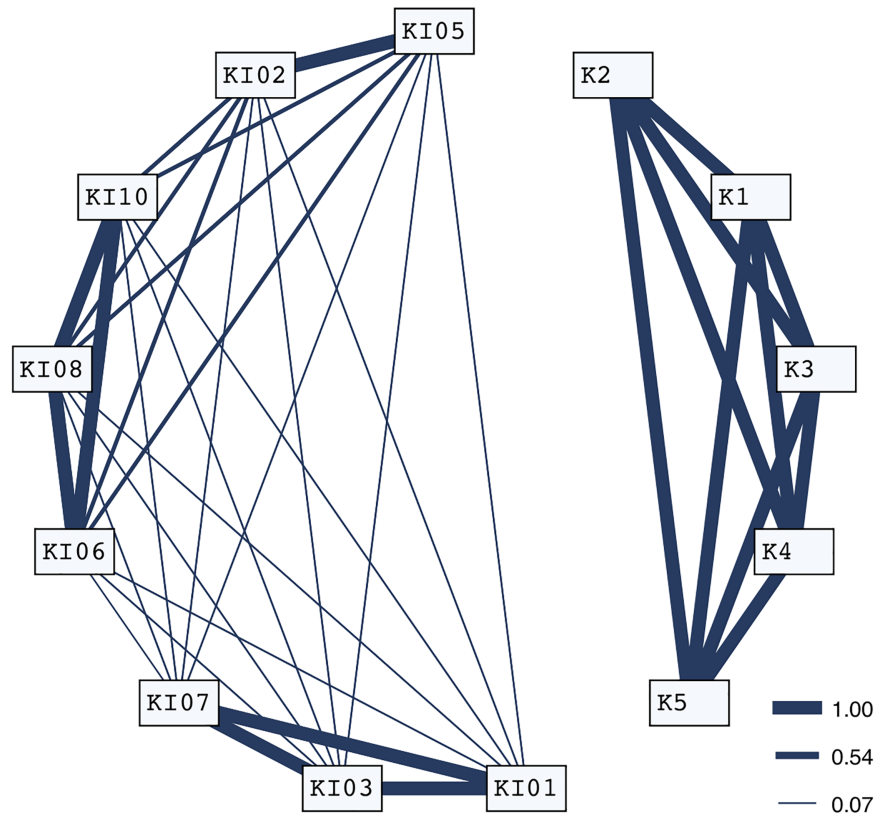

**Fig 5. Sociogram of seal-feeding killer whales observed in at least four sampling periods.** Occurrence and thickness of links show association patterns between pairs of individuals, revealing the two assemblages KI and K.

<https://doi.org/10.1371/journal.pone.0180099.g005>

### Group size and social organization

Mean group size for seal-feeding killer whales, accounting for both KI and K assemblages, was 5 individuals ( $N = 27$ , range = 3–11, median = 5). Fish-feeding killer whale groups encountered during spring-summers 2014, 2015 and 2016 averaged a group size of 13 individuals ( $N = 30$ , range = 6–25, median = 12), comparable to findings of Similä and colleagues [27]. The Mann-Whitney-Wilcoxon test supported a statistical difference between group size adopted by seal vs fish-feeding killer whales ( $W = 782.5$ ,  $p < 0.001$ ).

Sixty-eight identifications of 13 individuals over 17 sampling periods (= days) indicated two levels of association. First, individuals associated in 100% of observations enabled four apparently cohesive units to be identified. A second social level, involving temporary associations between cohesive units further indicated two distinct larger assemblages each represented by KI and K whales (Fig 5). The SD of calculated pairwise association indices was significantly higher for the real data set than for the random data ( $SD_{Real} = 0.40031$ ,  $SD_{Random} = 0.37726$ ,  $p = 0.0010$ ), enabling us to reject the null hypothesis that individuals associate at random. Temporal analyses revealed stable associations over long periods of time and above the null association rate (Fig 6).

### Discussion

We have documented a minimum of 13 killer whales, belonging to four stable units, and two larger assemblages (KI and K), that appear to regularly feed on seals in Norwegian coastal

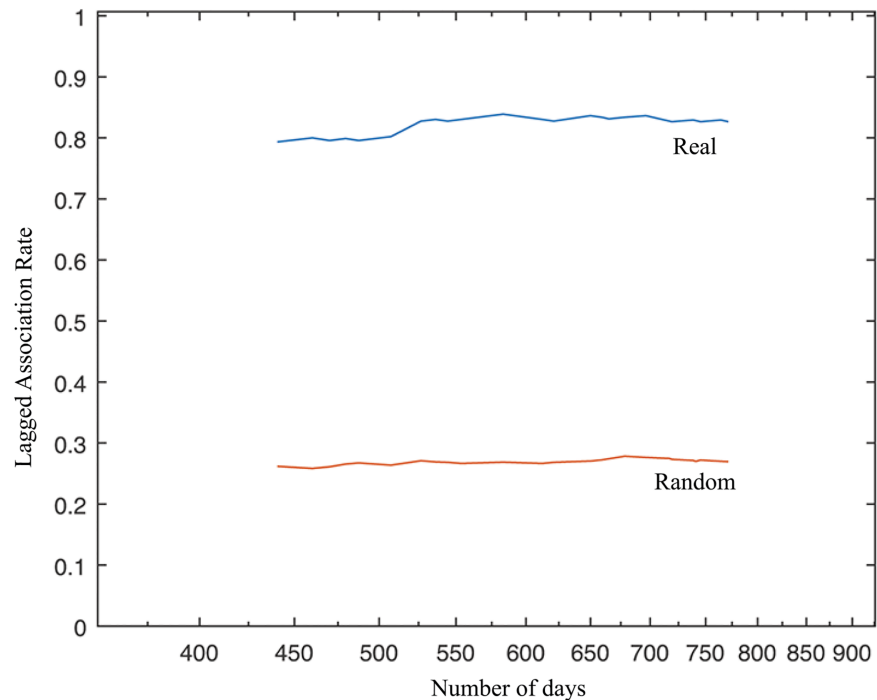

**Fig 6. Plots of lagged association rates.** The blue plot represents our real data set while the red plot shows the expected lagged association rates if individuals associated at random.

<https://doi.org/10.1371/journal.pone.0180099.g006>

waters. Repeated observations over time of identified individuals preying on seals support persistent preference for pinniped prey over several years for K whales, and for nearly three decades for KI-03, KI-05 and KI-06. A comparison of KI and K whales' behavioral traits to the social structure, occurrence pattern and foraging behavior described for pinniped-feeding killer whales in other regions [9–11, 18, 22, 47, 48] provide further insights into the degree of prey specialization for these whales.

Observations of KI and K whales were widely distributed along the Norwegian coast, with all sightings concentrated in important breeding areas for harbor and grey seals. Major breeding sites for both pinniped species can be found in Froan (64°05'N, 09°15'E), central Norway and in the northern part of the recorded range of this study [49, 50]. With one notable exception discussed below, all encounters with KI and K whales occurred in near shore shallow areas, typical pinniped habitat [49, 50] where the whales were observed following reefs and shoreline contours, or circling haul-outs with long dives, erratic swimming patterns and no real travel direction. This 'haul-out and near shore foraging' behavior has been described for transient killer whales hunting pinnipeds in the Northeastern Pacific [9, 10], at Subantarctic Marion Island and Possession Island, Crozet [47, 48]. Even though seals are non-migratory, thus offering a constant and predictable prey resource throughout their range along the Norwegian coast, it may be more rewarding for killer whales to forage around haul-outs in the breeding season where seal pups and females regularly enter and exit the water. Pacific transient killer whales appear to adapt their range, following latitudinal clines in timing of pupping [10]. Similarly, observations in northern Norway suggested a likelihood for KI and K whales to be observed near haul-outs at times coinciding with pupping periods of harbor seals (June–July, [51]) and grey seals (September–October, [50]) in this region. The timing of observations also suggests a north-south movement pattern for these whales, which coincides with local peaks in pupping and weaning of pinnipeds. More specifically, K whales travelled from the



Nordland region where they were observed from May through September to the Troms region where sightings were recorded in late October. This same pattern was repeated in 2014, 2015 and 2016, and observations followed the cline of the grey seal pupping period, which is delayed further north and occurs as late as November-December northwards in the Troms and Finnmark regions [52].

Further evidence supporting prey specialization in KI and K whales is a group size significantly smaller than the group size of herring-feeding killer whales. Living in small groups has been suggested as a strategy to maximize energy intake for pinniped-feeding killer whales. Small group sizes seem to guarantee stealthy and cooperative prey-searching and handling, whilst optimizing prey sharing [11]. In our dataset, small groups of seal-feeding killer whales were also long lasting, as revealed by temporal analyses of social organization. This is consistent with long-term cohesiveness of basic social units found to be a characteristic of the species, regardless of the prey-type hunted (e.g. [8, 22, 37, 53]). Stable and long-lasting social groups undoubtedly provide the raw material needed for social transmission of feeding behaviors and persistence of dietary habits over the years [54]. Additionally, temporary loose associations between stable units may be necessary for social learning of hunting skills and prey handling, and may explain the larger groups that were observed on a few occasions [10, 22]. On 27 June 2015, the three groups of KI whales were observed cooperatively hunting and sharing three seals over a period of six hours. Two juveniles under three years of age and a calf of the year were recorded in the group, and social play was observed when the whales handled a harbor seal pup for 40 minutes before killing it.

Two acoustic recordings available for K whales whilst handling seals at a close distance revealed no audible sounds, but sporadic trains of echolocation clicks from the whales. This is consistent with findings for marine mammal feeding killer whales from other regions [18, 55, 56], and is in sharp contrast to the highly vocal herring-feeding killer whales [57].

KI and K whales seem to have adopted strikingly similar adaptations to other pinniped-feeding killer whales. KI whales were observed feeding on herring in the spawning grounds in 1991 where they were also seen preying on seals. Despite massive study efforts and hundreds of identifications, KI and K groups were not identified on former or current herring wintering grounds during 1986–2003 and 2013–2016, respectively [34]. This could suggest that herring does not represent a main prey resource to these whales. However, because killer whale groups may display variations in habitat usage and preferences, and because data collection so far was largely opportunistic and covering a limited area, individuals might be undetected and not available for sampling in surveyed areas. Thus, absence of KI and K whales from the herring wintering grounds remain inconclusive.

How long these two assemblages have shown this type of prey specialization, and the origins of their distinctive diet remain largely unknown, but some major factors could be at least partially explanatory. The NSS stock of herring, the main prey base for killer whales in Norwegian coastal waters, collapsed in 1970 [58, 59]. How killer whales coped with prey depletion remains unknown, however they would likely have the phenotypic plasticity to adapt to changing environments as suggested by the wide variety of prey items and elaborated feeding techniques documented throughout their range [6, 60, 61]. Whilst prey switching appears as a potential adaptive response to decreasing prey supplies for numerous predator species [62–64], it is possible that some killer whale groups had diversified their diet and developed specific foraging strategies for new prey types in response to the drastic decrease in herring biomass [65]. Von-graven and Bisther [30] discussed this as a potential explanation for the observation of KI whales observed feeding in association with known herring feeding-killer whales in the spawning areas in March 1991, before splitting off into a smaller group and travelling a few miles to inshore waters where they started chasing harbor seals. The past culling of the killer whale

population, organized off the central Norwegian coast as a management action to preserve the remaining herring, may also have played a role in the niche diversification process [66, 67]. In 1969 and 1970, 167 and 201 killer whales were culled, respectively, over a 100 x 50 km area and within a few weeks. Entire groups were apparently never culled, and catch records showed a general lack of small individuals and a skewed sex ratio of 2M:1F [67]. Due to differential roles played by key members in cetacean societies and social transmission of matrilineal-based prey specializations in killer whales, feeding strategies may have been lost in culled groups, jeopardizing feeding success if key members were removed, and promoting potential changes in diet [68, 69].

This study revealed two assemblages of killer whales that persistently fed on seal prey and displayed parallel adaptations to that of pinniped-feeding killer whales from other regions, suggesting a certain degree of prey specialization. It remains, however, unknown as to whether KI and K whales are seasonal prey-specialists, switching between different prey types, or if they specialize on mammals year-round. Despite the observations of KI and K whales fitting well with the distribution of pinniped prey over the years, all observations have been recorded within coastal areas covered by the annual migration of the NSS herring. Thus, further analyses of dietary markers in biopsy samples are warranted, and this will constitute a research priority in order to conclude on the degree of prey specialization of these whales.

## Acknowledgments

We wish to thank Mellemværfet in Kristiansund and its residents for hospitality and accommodation during the fieldwork period 1988–1993. Tiu Similä gave us access to the identification catalogue from her long-term killer whale study. We are very grateful to photographers Nils Aukan, Ingar Øien, Camilla Ilmoni, Marten Brill, Inaki Aizpurua Quiroga, Laura Riem, Anders Frantzen, Camilla Figenschou, Simen Olsen, Steve Baines, Piet van den Bemd and Isabelle Dupré whose material contributed to building the sighting history of the seal-feeding killer whale groups in this study. We also thank Sea Safari Andenes, Arctic Whale Tours and Stø Safari for their involvement in this study by reporting killer whale sightings.

## Author Contributions

**Conceptualization:** Eve Jourdain, Dag Vongraven.

**Funding acquisition:** Eve Jourdain, Dag Vongraven, Anna Bisther, Richard Karoliussen.

**Investigation:** Eve Jourdain, Dag Vongraven, Anna Bisther, Richard Karoliussen.

**Methodology:** Eve Jourdain, Dag Vongraven, Anna Bisther, Richard Karoliussen.

**Project administration:** Eve Jourdain, Dag Vongraven.

**Resources:** Eve Jourdain, Dag Vongraven, Richard Karoliussen.

**Visualization:** Eve Jourdain, Dag Vongraven.

**Writing – original draft:** Eve Jourdain, Dag Vongraven.

**Writing – review & editing:** Eve Jourdain, Dag Vongraven, Anna Bisther, Richard Karoliussen.

## References

1. Forney KA, Wade PR. Worldwide distribution and abundance of killer whales. In: Estes JA, Demaster DP, Doak DF, Williams TM, Brownell RL, Jr., editors. Whales, whaling and ocean ecosystems 2006. p. 145–62.

2. Ford JKB. Killer whales *Orcinus orca*. In: Perrin WF, Würsig B, Thewissen JGM, editors. The encyclopedia of marine mammals. 2nd ed. San Diego, USA: Academic Press; 2009. p. 650–7.
3. Nichol LM, Shackleton DM. Seasonal movements and foraging behavior of northern resident killer whales (*Orcinus orca*) in relation to the inshore distribution of salmon (*Oncorhynchus* spp.) in British Columbia. *Canadian Journal of Zoology*. 1996; 74(6):983–91.
4. Ford JKB, Ellis GM, Barrett-Lennard LG, Morton AB, Palm RS, Balcomb KC. Dietary specialization in two sympatric populations of killer whales (*Orcinus orca*) in coastal British Columbia and adjacent waters. *Canadian Journal of Zoology*. 1998; 76(8):1456–71.
5. Saulitis E, Matkin C, Barrett-Lennard L, Heise K, Ellis G. Foraging strategies of sympatric killer whale (*Orcinus orca*) populations in Prince William Sound, Alaska. *Marine Mammal Science*. 2000; 16(1):94–109.
6. de Bruyn PJN, Tosh CA, Terauds A. Killer whale ecotypes: is there a global model? *Biological Reviews*. 2013; 88(1):62–80. <https://doi.org/10.1111/j.1469-185X.2012.00239.x> PMID: 22882545
7. Bigg M. An assessment of killer whale *Orcinus orca* stocks off Vancouver Island, British Columbia. Report of the International Whaling Commission. 1982; 32:655–66.
8. Bigg MA, Olesiuk PF, Ellis GM, Ford JKB, Balcomb KC. Social organization and genealogy of resident killer whales *Orcinus orca* in the coastal waters of British Columbia and Washington State. Report of the International Whaling Commission. 1990; 12:383–405.
9. Morton AB. A quantitative comparison of the behavior of resident and transient forms of the killer whale off the central British Columbia coast. Reports of the International Whaling Commission Special Issue. 1990:245–8.
10. Baird RW, Dill LM. Occurrence and behaviour of transient killer whales: Seasonal and pod-specific variability, foraging behaviour, and prey handling. *Canadian Journal of Zoology*. 1995; 73(7):1300–11.
11. Baird RW, Dill LM. Ecological and social determinants of group size in transient killer whales. *Behavioral Ecology*. 1996; 7(4):408–16.
12. Ford JKB, Ellis GM. You are what you eat: foraging specializations and their influence on the social organization and behavior of killer whales. In: Yamagiwa J, Karczmarski L, editors. *Primates and cetaceans: field research and conservation of complex mammalian societies*: Springer; 2014. p. 75–98.
13. Hoelzel AR, Dover GA. Genetic differentiation between sympatric killer whale populations. *Heredity*. 1991; 66:191–5.
14. Baird RW, Abrams PA, Dill LM. Possible indirect interactions between transient and resident killer whales: Implications for the evolution of foraging specializations in the genus *Orcinus*. *Oecologia*. 1992; 89:125–32. <https://doi.org/10.1007/BF00319024> PMID: 28313404
15. Filatova OA, Borisova EA, Shpak OV, Meschersky IG, Tiunov AV, Goncharov AA, et al. Reproductively isolated ecotypes of killer whales *Orcinus orca* in the seas of the Russian Far East. *Biology Bulletin*. 2015; 42(7):674–81. <https://doi.org/10.1134/s1062359015070043>
16. Pitman RL, Ensor P. Three forms of killer whales in Antarctic waters. *Journal of Cetacean Research and Management*. 2003; 5:131–9.
17. Krahn MM, Pitman RL, Burrows DG, Herman DP, Pearce RW. Use of chemical tracers to assess diet and persistent organic pollutants in Antarctic Type C killer whales. *Marine Mammal Science*. 2008; 24(3):643–63.
18. Deecke VB, Nykanen M, Foote AD, Janik VM. Vocal behaviour and feeding ecology of killer whales *Orcinus orca* around Shetland, UK. *Aquatic Biology*. 2011; 13(1):79–U186.
19. Dahlheim ME, White PA. Ecological aspects of transient killer whales *Orcinus orca* as predators in southeastern Alaska. *Wildlife Biology*. 2010; 16(3):308–22. <https://doi.org/10.2981/09-075>
20. Pitman RL, Durban JW. Cooperative hunting behavior, prey selectivity and prey handling by pack ice killer whales (*Orcinus orca*), type B, in Antarctic Peninsula waters. *Marine Mammal Science*. 2012; 28(1):16–36. <https://doi.org/10.1111/j.1748-7692.2010.00453.x>
21. Beck S, Kuningas S, Esteban R, Foote AD. The influence of ecology on sociality in the killer whale (*Orcinus orca*). *Behavioral Ecology*. 2012; 23(2):246–53.
22. Reisinger RR, Beukes C, Hoelzel AR, de Bruyn PJN. Kinship and association in a highly social apex predator population, killer whales at Marion Island. *Behavioral Ecology*. 2017; 28(3):750–9. <https://doi.org/10.1093/beheco/arx034>
23. Tavares SB, Samarra FIP, Miller PJO. A multilevel society of herring-eating killer whales indicates adaptation to prey characteristics. *Behavioral Ecology*. 2017; 28(2):500–14. <https://doi.org/10.1093/beheco/arw179>

24. Bisther A, Vongraven D, editors. Killer whales feeding on both mammals and fish: A transient, resident or opportunistic type? Poster presentation at the 14th Biennial Conference on the Biology of Marine Mammals; 2001; Vancouver, British Columbia, Canada 2001.
25. Samarra FIP, Foote AD. Seasonal movements of killer whales between Iceland and Scotland. *Aquatic Biology*. 2015; 24(1):75–9. <https://doi.org/10.3354/ab00637>
26. Foote AD, Newton J, Piartney SB, Willerslev E, Gilbert MTP. Ecological, morphological and genetic divergence of sympatric North Atlantic killer whale populations. *Molecular Ecology*. 2009; 18(24):5207–17. PMID: [20050301](https://pubmed.ncbi.nlm.nih.gov/20050301/)
27. Similä T, Holst JC, Christensen I. Occurrence and diet of killer whales in northern Norway: Seasonal patterns relative to the distribution and abundance of Norwegian spring-spawning herring. *Canadian Journal of Fisheries and Aquatic Sciences*. 1996; 53(4):769–79.
28. Bisther A, Vongraven D. Studies of social ecology of Norwegian killer whales (*Orcinus orca*). In: Blix AS, Walløe L, Ulltang Ø, editors. *Whales, seals, fish and man*: Elsevier Science; 1995. p. 169–76.
29. Similä T, Ugarte F. Surface and underwater observations of cooperatively feeding killer whales in northern Norway. *Canadian Journal of Zoology*. 1993; 71:1494–9.
30. Vongraven D, Bisther A. Prey switching by killer whales in the north-east Atlantic: observational evidence and experimental insights. *Journal of the Marine Biological Association of the United Kingdom*. 2014; 94(6):1357–65.
31. Cosentino AM. First record of Norwegian killer whales attacking and feeding on a harbour porpoise. *Marine Biodiversity Records*. 2015; 8:null-null. <https://doi.org/10.1017/S1755267215000895>
32. Institute of Marine Research. Havforskningsrapporten 2016 (in Norwegian). *Fisken og havet*. 2016; Special Issue 1:203 pp.
33. ESRI. ArcGIS Desktop: Release 10.5. Redlands, CA: Environmental Systems Research Institute; 2016.
34. Jourdain E, Karoliussen R. The Norwegian Orca ID-catalogue. 2016. 10.6084/m9.figshare.4205226.
35. Altmann J. Observational study of behavior: Sampling methods. *Behaviour*. 1974; 49:227–67. PMID: [4597405](https://pubmed.ncbi.nlm.nih.gov/4597405/)
36. Kuningas S, Similä T, Hammond PS. Population size, survival and reproductive rates of northern Norwegian killer whales (*Orcinus orca*) in 1986–2003. *Journal of the Marine Biological Association of the United Kingdom*. 2014; 94(6):1277–91. <https://doi.org/10.1017/s0025315413000933>
37. Baird RW, Whitehead H. Social organization of mammal-eating killer whales: group stability and dispersal patterns. *Canadian Journal of Zoology*. 2000; 78(12):2096–105.
38. R Core Team. R: A language and environment for statistical computing. R Foundation for Statistical Computing, Vienna, Austria. <http://www.R-project.org>. 2013.
39. Whitehead H. SOCPROG programs: analysing animal social structures. *Behavioral Ecology and Sociobiology*. 2009; 63(5):765–78. <https://doi.org/10.1007/s00265-008-0697-y>
40. Ginsberg JR, Young TP. Measuring association between individuals or groups in behavioural studies. *Animal Behaviour*. 1992; 44:377–9.
41. Ottensmeyer CA, Whitehead H. Behavioural evidence for social units in long-finned pilot whales. *Canadian Journal of Zoology*. 2003; 81:1327–38.
42. Whitehead H, Dufault S. Techniques for Analyzing Vertebrate Social Structure Using Identified Individuals: Review and Recommendations. In: Peter J.B. Slater JSRCTS, Timothy JR, editors. *Advances in the Study of Behavior*. Volume 28: Academic Press; 1999. p. 33–74.
43. Bejder L, Fletcher D, Brager S. A method for testing association patterns of social animals. *Animal Behaviour*. 1998; 56:719–25. <https://doi.org/10.1006/anbe.1998.0802> PMID: [9784222](https://pubmed.ncbi.nlm.nih.gov/9784222/)
44. Whitehead H. Testing association patterns of social animals. *Animal Behaviour*. 1999; 57:F26–F9. <https://doi.org/10.1006/anbe.1999.1099> PMID: [10373270](https://pubmed.ncbi.nlm.nih.gov/10373270/)
45. Whitehead H. Selection of models of lagged identification rates and lagged association rates using AIC and QAIC. *Communications in Statistics-Simulation and Computation*. 2007; 36(6):1233–46.
46. Whitehead H. Investigating structure and temporal scale in social organizations using identified individuals. *Behavioral Ecology*. 1995; 6(2):199–208. <https://doi.org/10.1093/beheco/6.2.199>
47. Reisinger RR, De Bruyn PJN, Tosh CA, Oosthuizen WC, Mufanadzo NT, Bester MN. Prey and seasonal abundance of killer whales at sub-Antarctic Marion Island. *African Journal of Marine Science*. 2011; 33(1):99–105.
48. Guinet C. Intentional stranding apprenticeship and social play in killer whales *Orcinus orca*. *Canadian Journal of Zoology*. 1991; 69:2712–6.

49. Nilssen KT, Skavberg NE, Poltermann M, Haug T, Härkönen T, Henriksen G. Status of harbour seals (*Phoca vitulina*) in mainland Norway. NAMMCO Scientific Publications. 2010; 8:61–9.
50. Nilssen KT, Haug T. Status of grey seals (*Halichoerus grypus*) in Norway. NAMMCO Scientific Publications. 2007; 6:23–31.
51. Bjørge A. Status of the harbor seal *Phoca vitulina* in Norway. Biological Conservation. 1991; 58(2):229–38. [https://doi.org/10.1016/0006-3207\(91\)90121-o](https://doi.org/10.1016/0006-3207(91)90121-o)
52. Haug T, Henriksen G, Kondakov A, Mishin V, Nilssen KT, Røv N. The status of grey seals *Halichoerus grypus* in North Norway and on the Murman Coast, Russia. Biological Conservation. 1994; 70:59–67.
53. Esteban PR. Abundancia, estructura social y parámetros de historia natural de las orcas (*Orcinus orca*) del Estrecho de Gibraltar University of Cadiz, Spain; 2008.
54. Riesch R, Barrett-Lennard LG, Ellis GM, Ford JKB, Deecke VB. Cultural traditions and the evolution of reproductive isolation: ecological speciation in killer whales? Biological Journal of the Linnean Society. 2012; 106:1–17.
55. Barrett-Lennard LG, Ford JKB, Heise KA. The mixed blessing of echolocation: Differences in sonar use by fish-eating and mammal-eating killer whales. Animal Behaviour. 1996; 51(3):553–65.
56. Guinet C. Comportement de chasse des orques *Orcinus orca* autour des îles Crozet. Canadian Journal of Zoology. 1992; 70:1656–67.
57. Simon M, McGregor PK, Ugarte F. The relationship between the acoustic behaviour and surface activity of killer whales (*Orcinus orca*) that feed on herring (*Clupea harengus*). Acta Ethologica. 2007; 10(2):47–53.
58. Dragesund O, Johannessen A, Ulltang Ø. Variation in migration and abundance of Norwegian spring spawning herring (*Clupea harengus* L.). Sarsia. 1997; 82:97–105.
59. Dragesund O, Hamre J, Ulltang Ø. Biology and population dynamics of the Norwegian spring-spawning herring. Rapports et Procès-verbaux des Réunions Conseil International pour l'Exploration de la Mer. 1980; 177(43–71).
60. Samarra FIP, Miller PJO. Prey-induced behavioural plasticity of herring-eating killer whales. Marine Biology. 2015; 162(4):809–21. <https://doi.org/10.1007/s00227-015-2626-8>
61. Whitman DW, Agrawal AA. What is phenotypic plasticity and why is it important? In: Whitman DW, Ananthakrishnan TN, editors. Phenotypic plasticity in insects. Enfield: Science Publishers; 2009. p. 1–63.
62. Panzacchi M, Linnell JDC, Odden J, Odden M, Andersen R. When a generalist becomes a specialist: patterns of red fox predation on roe deer fawns under contrasting conditions. Canadian Journal of Zoology-Revue Canadienne De Zoologie. 2008; 86(2):116–26. <https://doi.org/10.1139/z07-120>
63. Randa LA, Cooper DM, Meserve PL, Yunker JA. Prey switching of sympatric canids in response to variable prey abundance. Journal of Mammalogy. 2009; 90(3):594–603. <https://doi.org/10.1644/08-mamm-a-092r1.1>
64. Tinker MT, Bentall G, Estes JA. Food limitation leads to behavioral diversification and dietary specialization in sea otters. Proceedings of the National Academy of Sciences of the United States of America. 2008; 105(2):560–5. <https://doi.org/10.1073/pnas.0709263105> PMID: 18195370
65. Piltz SH, Porter MA, Maini PK. Prey Switching with a Linear Preference Trade-Off. SIAM Journal on Applied Dynamical Systems. 2014; 13(2):658–82. <https://doi.org/10.1137/130910920>
66. Marine Research Institute. Catch of killer whales in the North Atlantic 1938–1981. 2016.
67. Vongraven D, Bisther A. Possible effects of previous catch on the present population of Norwegian killer whales (*Orcinus orca*). In: Blix AS, Walløe L, Ulltang Ø, editors. Whales, seals, fish and man: Elsevier Science; 1995. p. 177–9.
68. Williams R, Lusseau D. A killer whale social network is vulnerable to targeted removals. Biology Letters. 2006; 2(4):497–500. <https://doi.org/10.1098/rsbl.2006.0510> PMID: 17148272
69. Whitehead H, Rendell L. Movements, habitat use and feeding success of cultural clans of South Pacific sperm whales. Journal of Animal Ecology. 2004; 73(1):190–6.
